# Supplementary material
Source: PubMed Central journal article supplement (PMC8722780)
Supplement: sj-pdf-1-jrs-10.1177_01410768211032589.pdf [file sj-pdf-1-jrs-10.1177_01410768211032589.pdf]

Appendix 1: Detailed breakdown of contributory factors by incident type

| Contributory Factors             | Incident Type                       |            |            |           |            |                       |               |           |                |
|----------------------------------|-------------------------------------|------------|------------|-----------|------------|-----------------------|---------------|-----------|----------------|
|                                  | Referrals and transfers of patients | Diagnostic | Assessment | Treatment | Medication | Investigation/imaging | Communication | Equipment | Administration |
| <b>Patient Factors</b>           |                                     |            |            |           |            |                       |               |           |                |
| Out of area: patient new to area |                                     |            |            |           |            |                       | 1             |           |                |
| Self - discharge                 |                                     | 1          |            |           |            |                       |               |           |                |
| Non-disclosure                   | 1                                   |            |            |           |            |                       |               |           |                |
| Pathophysiological factors       |                                     | 6          | 1          | 4         | 2          | 1                     |               | 1         | 1              |
| Disability                       |                                     | 1          |            |           |            |                       |               |           |                |
| Allergy                          |                                     |            |            | 1         | 2          |                       |               |           |                |
| Poor Understanding               |                                     |            |            |           | 1          |                       |               |           |                |
| <b>Staff Factors</b>             |                                     |            |            |           |            |                       |               |           |                |
| Failure to follow protocols      | 4                                   | 2          | 1          | 14        | 8          |                       | 1             |           |                |
| Inadequate skills/knowledge      |                                     | 2          |            |           | 2          |                       |               |           |                |
| Mistake                          |                                     | 11         | 1          | 4         | 4          | 3                     |               |           |                |
| Distraction/inattention          | 1                                   | 1          |            | 2         | 1          | 1                     | 1             |           |                |
| Haste                            |                                     |            |            |           |            |                       |               | 1         |                |
| Misread                          |                                     | 3          |            |           | 1          |                       |               |           |                |
| Handwriting                      |                                     |            |            |           | 1          |                       |               |           |                |
| <b>Equipment/medication</b>      |                                     |            |            |           |            |                       |               |           |                |
| Equipment                        |                                     |            |            | 1         |            |                       | 1             | 2         |                |

|                                         |   |   |   |   |   |   |   |   |   |
|-----------------------------------------|---|---|---|---|---|---|---|---|---|
| Poor design of equipment                | 1 |   |   | 3 |   |   |   | 1 |   |
| Medication storage                      |   |   |   |   | 1 |   |   |   |   |
| Lack of Stock                           |   |   |   | 1 |   |   |   |   |   |
| Transfer of care/handovers/Team factors |   |   |   |   |   |   |   |   |   |
| High risk/unwell patients               | 1 |   |   |   |   |   |   |   |   |
| Medications                             |   |   |   |   | 1 |   |   |   |   |
| Investigations                          |   | 1 |   |   |   |   |   |   |   |
| Referrals                               | 4 | 1 | 1 | 4 | 1 | 1 |   | 1 | 2 |
| Continuity of care                      | 3 | 3 |   | 7 | 2 |   |   |   |   |
| Staff not aware of patient              | 2 | 1 | 1 | 1 |   |   | 1 |   |   |
| Between primary and secondary care      |   | 1 | 1 |   | 1 |   | 1 |   | 1 |
| Lack of space for patient               | 3 |   |   | 9 |   | 2 |   |   |   |
| Staffing levels                         | 2 |   |   |   |   |   |   |   |   |
| Shift pattern                           |   |   | 1 | 1 |   |   |   |   |   |
| Insufficient staff                      |   |   |   | 6 |   | 2 |   |   |   |
| Team factors                            | 3 | 3 | 4 | 5 | 2 | 1 | 1 |   |   |
| Overloaded by work                      | 2 | 3 | 1 | 3 | 2 | 1 |   |   |   |
| Training                                | 1 |   |   |   |   |   |   |   |   |
| Supervision                             |   |   |   | 1 | 1 | 1 | 1 |   |   |
| Service unavailable                     |   |   |   | 1 |   |   |   |   |   |
| Long wait for service                   | 1 | 2 |   | 1 |   |   |   |   |   |
